# Supplementary material for: Ultralow Ru-assisted and vanadium-doped flower-like CoP/Ni2P heterostructure for efficient water splitting in alkali and seawater
Source: Royal Society of Chemistry journal article supplement (doi:10.1039/d1ta08699e), 2021-01-01
Supplement: d1ta08699e1.pdf [file d1ta08699e1.pdf]

## Supplementary Material

### **Ultralow Ru-assisted and Vanadium-doped Flower-like CoP/Ni<sub>2</sub>P Heterostructure for Efficient Water Splitting in Alkali and Seawater**

Qianli Ma<sup>a,b</sup>, Huihui Jin<sup>a</sup>, Fanjie Xia<sup>a</sup>, Hanwen Xu<sup>a</sup>, Jiawei Zhu<sup>a</sup>, Rui Qin<sup>a</sup>, Huawei Bai<sup>a</sup>, Binbin Shuai<sup>a</sup>, Wenyang Huang<sup>a</sup>, Ding Chen<sup>a</sup>, Zilan Li<sup>a</sup>, Jinsong Wu<sup>a</sup>, Jun Yu<sup>a</sup>, Shichun Mu<sup>\*a,b</sup>

<sup>a</sup>State Key Laboratory of Advanced Technology for Materials Synthesis and Processing, Wuhan University of Technology, Wuhan 430070, China.

<sup>b</sup>Foshan Xianhu Laboratory of the Advanced Energy Science and Technology Guangdong Laboratory, Xianhu Hydrogen Valley, Foshan 528200, China.

\*Corresponding authors E-mail: [msc@whut.edu.cn](mailto:msc@whut.edu.cn) (S. Mu).

## Materials

Cobalt nitrate hexahydrate ( $\text{Co}(\text{NO}_3)_2 \cdot 6\text{H}_2\text{O}$ ), urea ( $\text{CH}_4\text{N}_2\text{O}$ ), ammonium fluoride ( $\text{NH}_4\text{F}$ ), sodium hypophosphite ( $\text{NaH}_2\text{PO}_2 \cdot \text{H}_2\text{O}$ ) and potassium hydroxide ( $\text{KOH}$ ) were purchased from Sinopharm Chemical Reagent Co., Ltd. Ammonium metavanadate ( $\text{NH}_4\text{VO}_3$ ) and Ruthenium chloride hydrate ( $\text{RuCl}_3 \cdot x\text{H}_2\text{O}$ ) were purchased from Aladdin Chemical Reagent Co., Ltd. Acetone was purchased from Shanghai Chemical Reagent Company.  $\text{RuO}_2$ , Pt/C and Nafion (5 wt%) were purchased from Sigma-Aldrich. All reagents were used directly without purification.

## Experimental section

**Preparation of Ru-CoV-LDH/NF:**  $2 \times 3 \text{ cm}^2$  nickel foam (NF) was sonicated successively in acetone and ethanol for 15 minutes to remove the surface oxide layer and impurities. 117 mg ammonium metavanadate, 1.164 g cobalt nitrate hexahydrate, 80 mg ammonium fluoride and 260 mg urea were stirred in 30 mL water at  $50^\circ\text{C}$  for 30 min. Put the processed NF in the above solution and put it into a 50 mL reactor, and keep it at  $120^\circ\text{C}$  for 360 min. After cooling to room temperature, CoV-LDH/NF was taken out and placed in  $\text{RuCl}_3$  ethanol solution (20 mg/mL) for 1 h. Ru-CoV-LDH/NF can be obtained by vacuum drying at  $60^\circ\text{C}$  for 12 hours. The loading mass of the catalyst is  $3.6 \text{ mg cm}^{-2}$ . Ru-Co-LDH/NF and CoV-LDH/NF were prepared without adding ammonium metavanadate and without immersing  $\text{RuCl}_3$  solution as control samples.

**Preparation of RuV-CoNiP/NF:** 1.0g  $\text{NaH}_2\text{PO}_2 \cdot \text{H}_2\text{O}$  was placed 10 cm upstream of the position of Ru-CoV-LDH/NF in the tube furnace. In argon, ventilate for 1 hour to drive out the air, and then increase the temperature to  $350^\circ\text{C}$  at a rate of  $3^\circ\text{C}$  per minute for 2 hours. Finally, the RuV-CoNiP/NF can be obtained by cooling to room temperature. Ru-CoNiP/NF and V-CoNiP/NF are prepared in the same way as RuV-CoNiP/NF.

## Material Characterization

X-ray diffraction (XRD) was obtained on a Rigaku X-ray diffractometer equipped with a Cu  $K\alpha$  radiation source. The morphology and structure were characterized by scanning electron microscope (SEM, Zeiss Ultra Plus) and transmission electron microscope (TEM, HITACHI H-8100). X-ray photoelectron spectroscopy (XPS) was obtained on the type II X-ray photoelectron spectrometer. ICP-AES analysis obtained on Optima Prodigy 7 (LEEMAN LABS Ltd., USA).

## Electrochemical Measurements

The electrochemical test is obtained in a three-electrode system with carbon rods and Hg/HgO as the counter electrode and reference electrode, and the electrolyte is 1 M KOH. The prepared catalyst is directly cut into a specific area to serve as a working electrode. The commercial electrocatalyst for comparison was obtained by first configuring  $\text{RuO}_2$  and Pt/C as ink, and then evenly spreading it on the NF substrate ( $8 \text{ mg cm}^{-2}$ ). The workstation

used for the test is CHI 660E electrochemical analyzer (CHI Instruments, Shanghai, China). The polarization curves of OER and HER have been  $iR$  corrected ( $E_{iR\text{-corrected}} = E - iR$ , where  $E$  is the original potential,  $R$  is the solution resistance,  $i$  is the corresponding current, and  $E_{iR\text{-corrected}}$  is the  $iR$ -corrected potential). The voltages of HER and OER are both converted to the RHE scale by the formula  $E(\text{vs. RHE}) = E(\text{vs. Hg/HgO}) + 0.059 \cdot \text{pH} + 0.098 \text{ V}$ . The frequency range of the electrochemical impedance spectroscopy (EIS) test is 0.01 Hz to 100 kHz, and the AC amplitude is 10 mV. To obtain the electrochemical double layer capacitance ( $C_{dl}$ ), cyclic voltammetry (CV) was performed at different scan rates (20, 40, 60, 80 and 100  $\text{mV s}^{-1}$ ) of 0 ~ 0.1 V vs Hg/HgO.

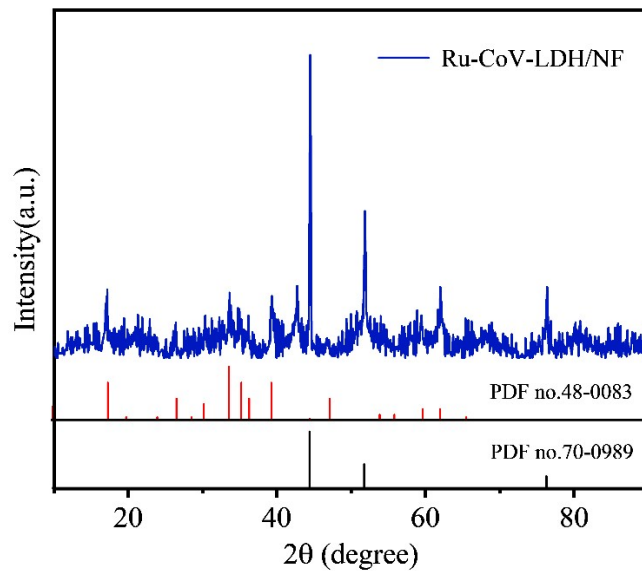

**Figure S1.** XRD pattern of Ru-CoV-LDH/NF.

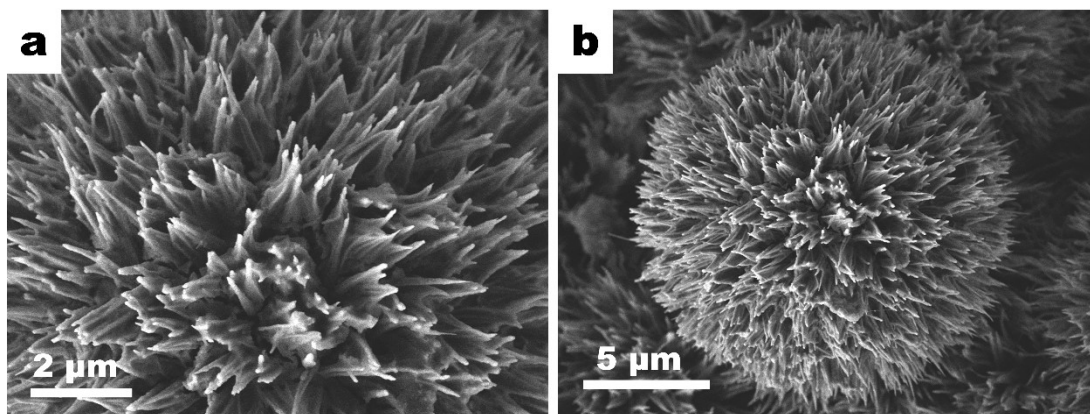

**Figure S2.** SEM images of Ru-CoV-LDH/NF.

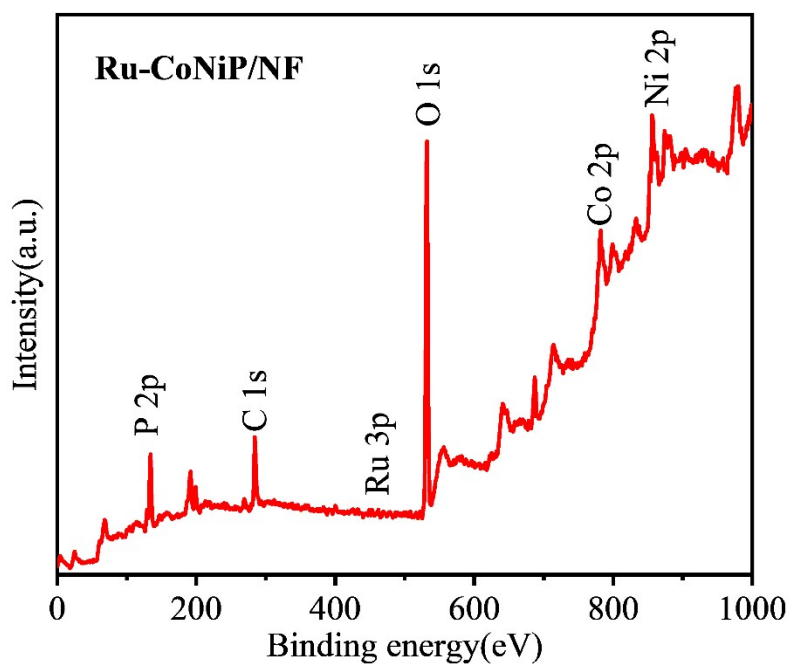

**Figure S3.** XPS survey pattern of Ru-CoNiP/NF.

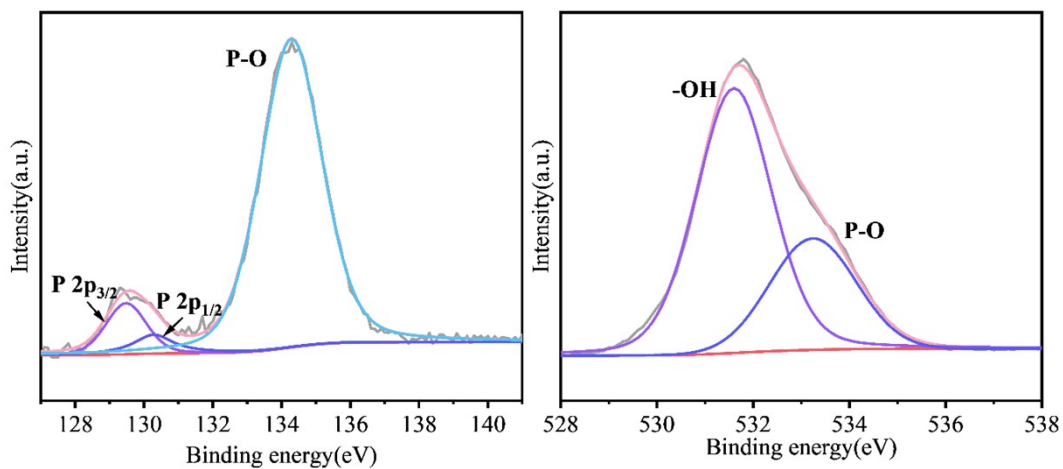

**Figure S4.** O 1s and P 2p of RuV-CoNiP/NF spectra.

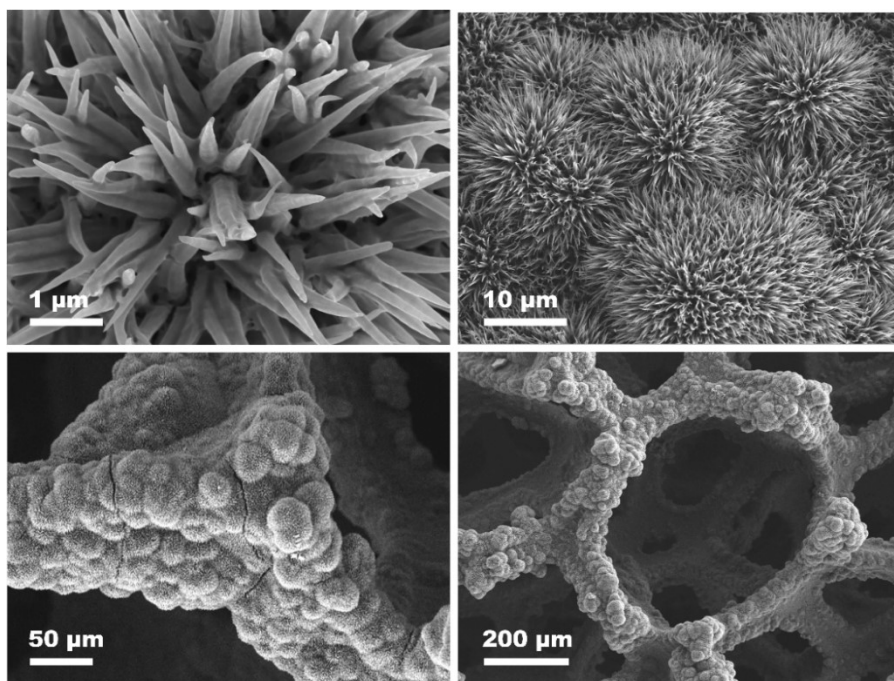

**Figure S5.** SEM images of RuV-CoNiP/NF.

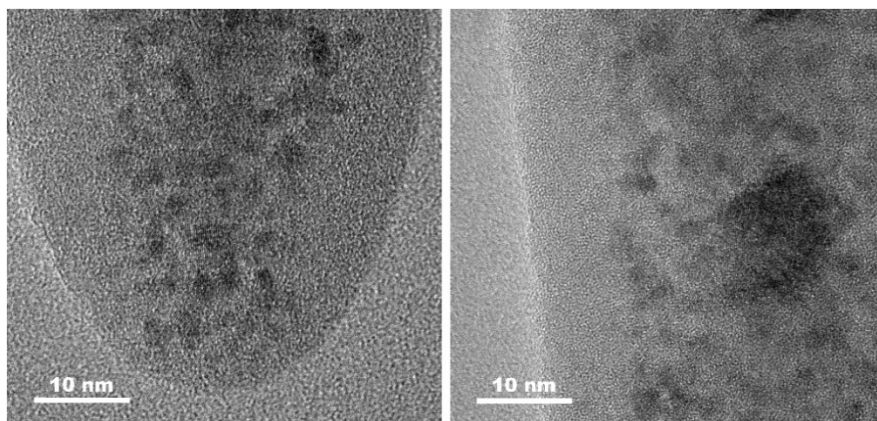

**Figure S6.** TEM images of RuV-CoNiP/NF.

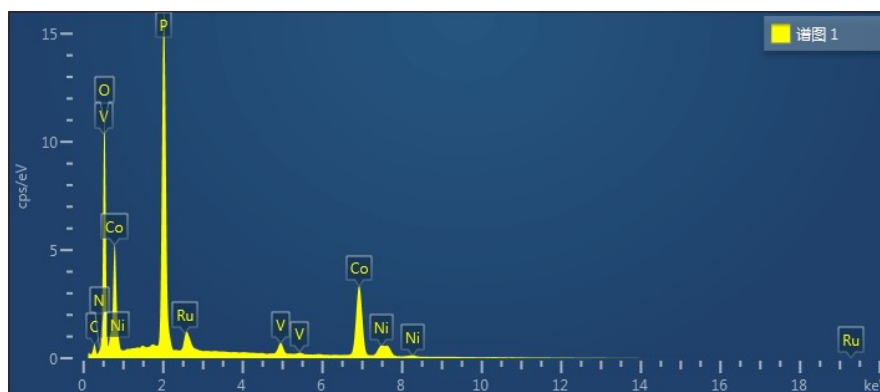

**Figure S7.** EDX spectrum of RuV-CoNiP/NF.

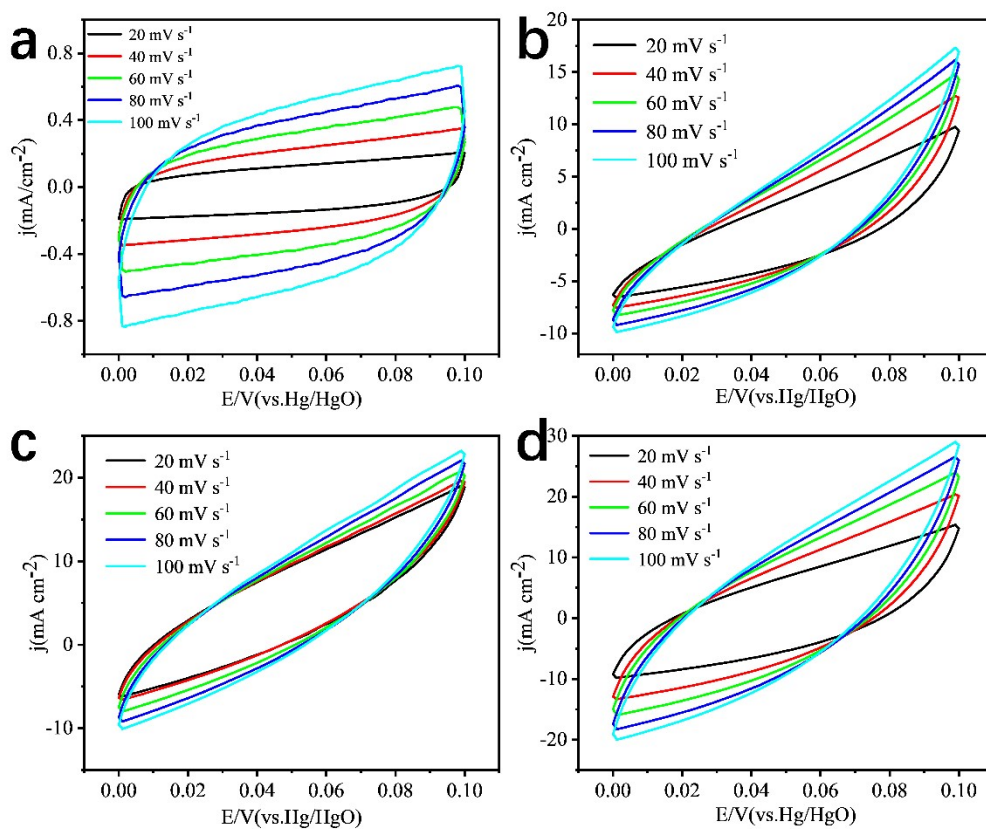

**Figure S8.** Cyclic voltammograms of (a) bare NF, (b) V-CoNiP/NF, (c) Ru-CoNiP/NF and (d) RuV-CoNiP/NF in the non-faradic capacitance current range from 20 to 100  $\text{mV s}^{-1}$ .



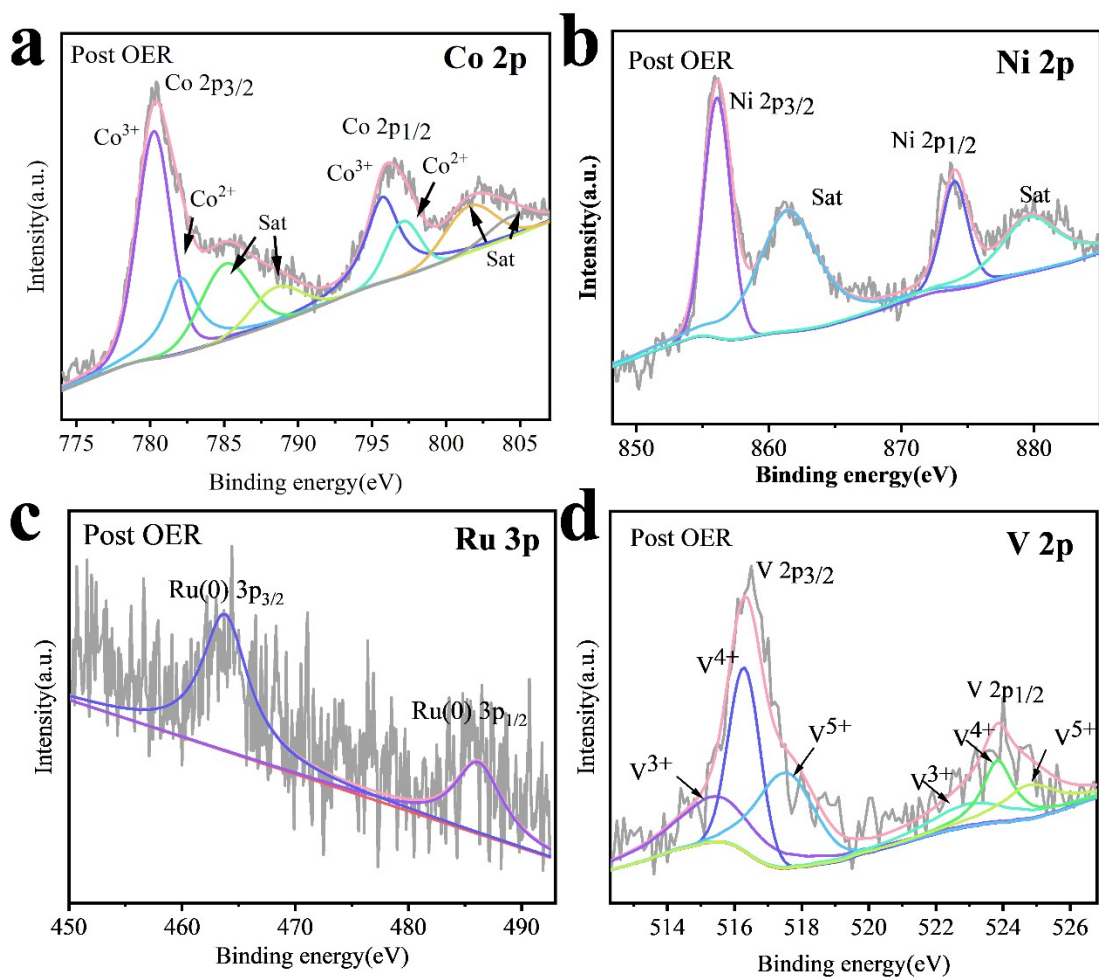

**Figure S9.** (a) Co 2p, (b) Ni 2p, (c) Ru 3p and (d) V 2p of RuV-CoNiP/NF spectrums after OER test.

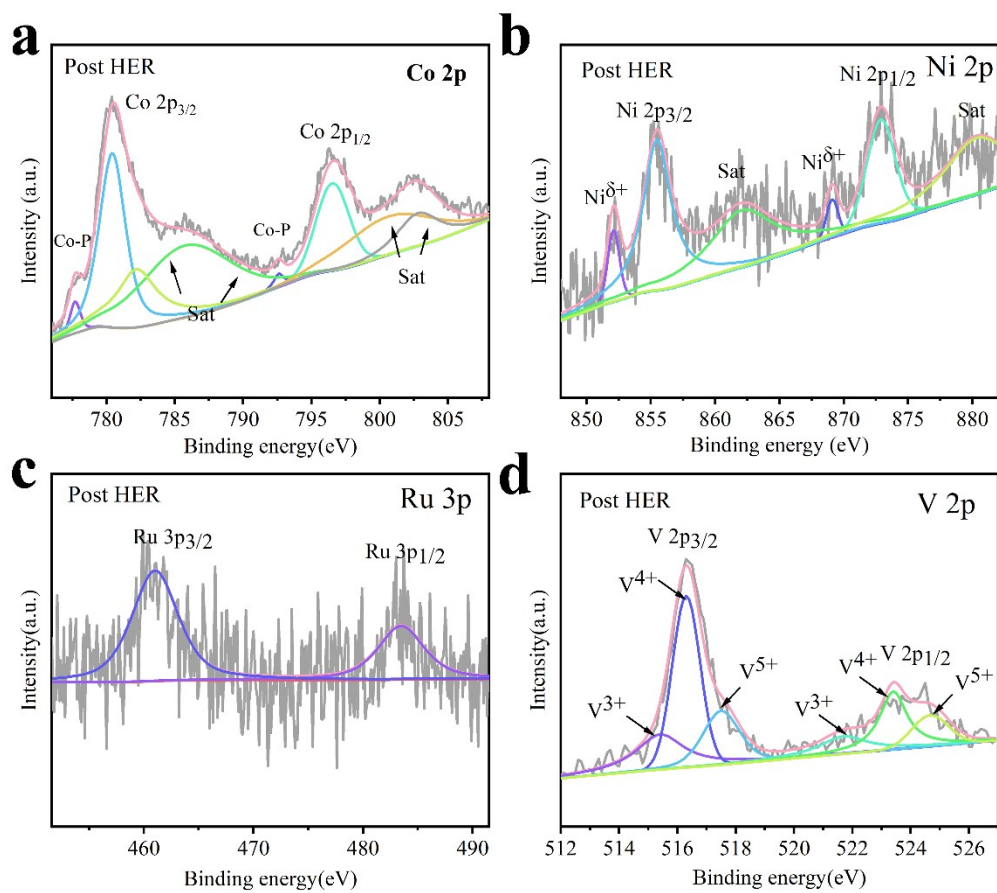

**Figure S10.** (a) Co 2p, (b) Ni 2p, (c) Ru 3p and (d) V 2p of RuV-CoNiP/NF spectrums after HER test.

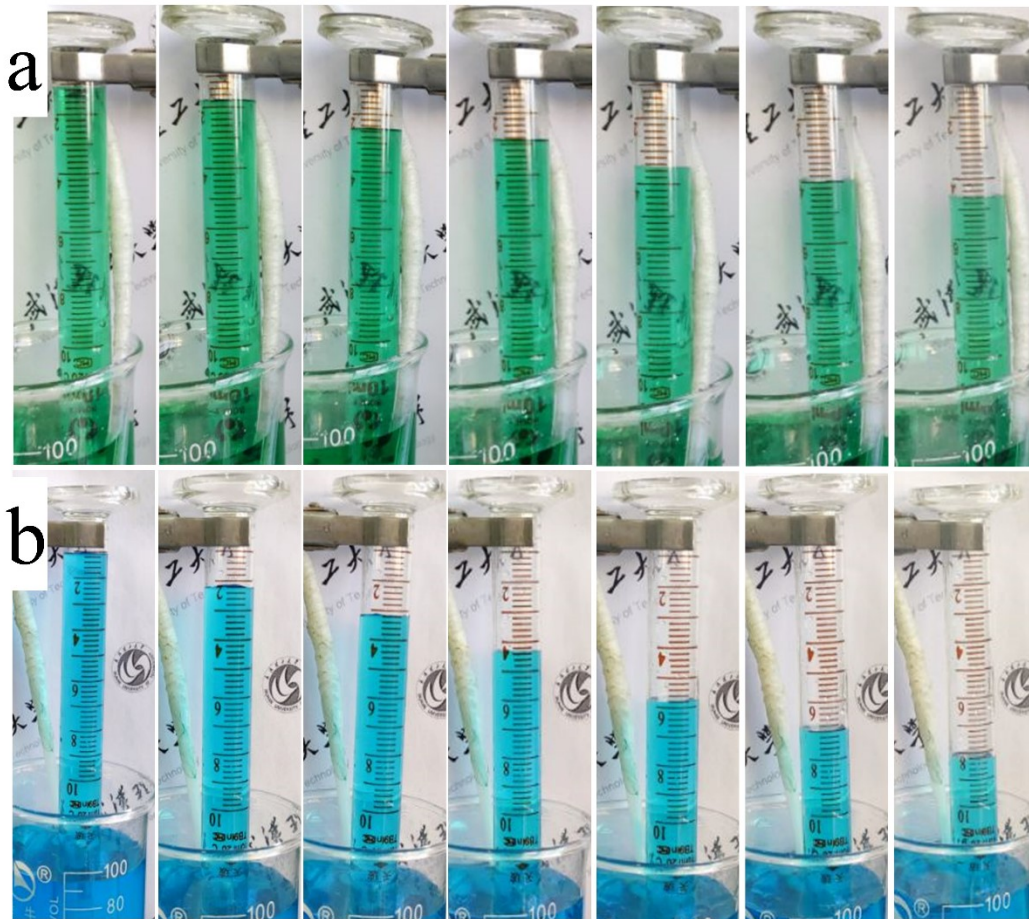

**Figure S11.** (a-b) Changes in the volume of (a)  $O_2$  and (b)  $H_2$  over time.

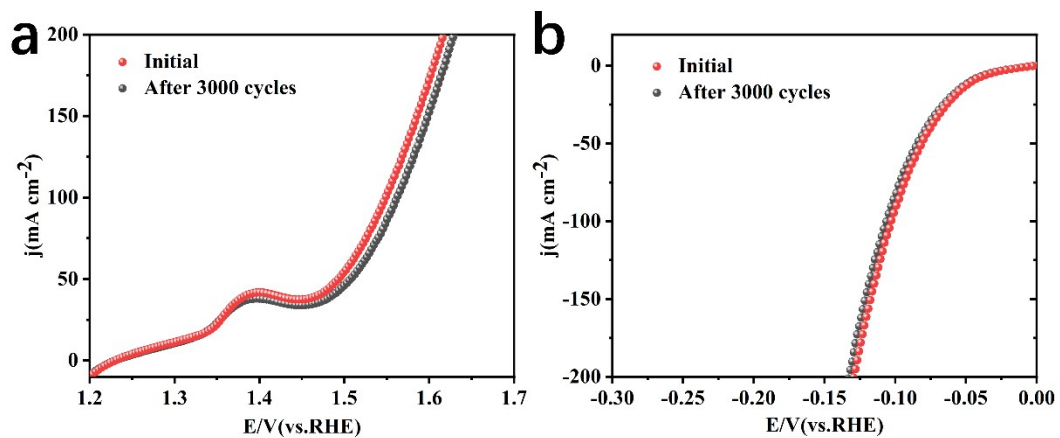

**Figure S12.** LSV curves of RuV-CoNiP/NF before and after accelerated durability test in alkaline seawater

**Table S1.** Ni, Co, Ru, V, P, N, C and O atomic percentages of RuV-CoNiP/NF in XPS survey scan.

| <b>Sample</b>             | <b>Ni</b>    | <b>Co</b>   | <b>Ru</b>   | <b>V</b>    | <b>P</b>    | <b>N</b>    | <b>C</b>     | <b>O</b>     |
|---------------------------|--------------|-------------|-------------|-------------|-------------|-------------|--------------|--------------|
| <b>atomic percentages</b> | <b>11.56</b> | <b>5.47</b> | <b>0.47</b> | <b>0.76</b> | <b>9.96</b> | <b>1.73</b> | <b>27.07</b> | <b>42.98</b> |

**Table S2.** Ni, Co, Ru, V, P, N, C and O atomic percentages of RuV-CoNiP/NF in EDS elemental mapping.

| <b>Sample</b>             | <b>Ni</b>   | <b>Co</b>    | <b>Ru</b>   | <b>V</b>    | <b>P</b>     | <b>N</b>    | <b>C</b>     | <b>O</b>     |
|---------------------------|-------------|--------------|-------------|-------------|--------------|-------------|--------------|--------------|
| <b>atomic percentages</b> | <b>3.23</b> | <b>20.11</b> | <b>0.69</b> | <b>1.45</b> | <b>21.06</b> | <b>1.54</b> | <b>10.54</b> | <b>41.38</b> |

**Table S3.** Ni, Co, Ru, V and P weight percentages of RuV-CoNiP/NF in inductively coupled plasma (ICP).

| <b>Sample</b>             | <b>Ni</b>    | <b>Co</b>    | <b>Ru</b>   | <b>V</b>     | <b>P</b>     |
|---------------------------|--------------|--------------|-------------|--------------|--------------|
| <b>Weight percentages</b> | <b>23.85</b> | <b>41.66</b> | <b>4.65</b> | <b>10.00</b> | <b>19.84</b> |

**Table S4.** Performance comparison of RuV-CoNiP/NF and recently reported self-supporting OER catalysts in 1M KOH.

| Catalyst                                                         | Support         | Overpotential@j<br>(mV @ mA cm <sup>-2</sup> ) | Mass loading<br>(mg cm <sup>-2</sup> ) | reference |
|------------------------------------------------------------------|-----------------|------------------------------------------------|----------------------------------------|-----------|
| RuV-CoNiP                                                        | Nickel foam     | 214@20<br>245@50<br>266@100                    | 3.6                                    | This work |
| IrNi-FeNi <sub>3</sub>                                           | Nickel foam     | 240@20                                         | not provided                           | 1         |
| Co <sub>4</sub> N-CeO <sub>2</sub> /GP                           | Graphitic Plate | 239@10                                         | 4.0                                    | 2         |
| (Ru-Co)O <sub>x</sub>                                            | Carbon cloth    | 171@10                                         | not provided                           | 3         |
| Fe <sub>x</sub> Ni <sub>3-x</sub> S <sub>2</sub>                 | Nickel foam     | 252@100                                        | not provided                           | 4         |
| Ni <sup>III</sup> Co <sup>II</sup> Fe-O                          | Nickel foam     | 258@50                                         | not provided                           | 5         |
| NF-Na-Fe-Pt                                                      | Nickel foam     | 261@10                                         | not provided                           | 6         |
| CoFeZr oxides                                                    | Nickel foam     | 264@20                                         | not provided                           | 7         |
| Co-Co <sub>2</sub> C                                             | Carbon cloth    | 261@10                                         | 3.2                                    | 8         |
| Ni-Mo <sub>2</sub> C/NC                                          | Nickel foam     | 337@10                                         | 2.5                                    | 9         |
| Fe-CoP                                                           | Nickel foam     | 190@10                                         | 4.2                                    | 10        |
| Ru-NiCoP                                                         | Nickel foam     | 216@20                                         | not provided                           | 11        |
| Ru-MnFeP                                                         | Nickel foam     | 191@20                                         | not provided                           | 12        |
| MoNi <sub>3</sub> S <sub>2</sub> /Ni <sub>x</sub> P <sub>y</sub> | Nickel foam     | 238@50                                         | 3.15                                   | 13        |

|                                     |             |        |              |    |
|-------------------------------------|-------------|--------|--------------|----|
| CoFe<br>PBA@CoP                     | Nickel foam | 171@10 | not provided | 14 |
| V-doped CoP                         | Nickel foam | 265@20 | not provided | 15 |
| CoMnP/Ni <sub>2</sub> P             | Nickel foam | 209@10 | 1.62         | 16 |
| Ni <sub>2</sub> P-Fe <sub>2</sub> P | Nickel foam | 261@10 | 15           | 17 |
| Co <sub>2</sub> P-Ni <sub>2</sub> P | Nickel foam | 230@50 | 1.51         | 18 |

**Table S5.** Performance comparison of RuV-CoNiP/NF and recently reported self-supporting HER catalysts in 1M KOH.

| Catalyst                                         | Support            | Overpotential@j<br>(mV @ mA cm <sup>-2</sup> ) | Mass loading<br>(mg cm <sup>-2</sup> ) | reference |
|--------------------------------------------------|--------------------|------------------------------------------------|----------------------------------------|-----------|
| RuV-CoNiP                                        | Nickel foam        | 28@10                                          | 3.6                                    | This work |
| IrNi-FeNi <sub>3</sub>                           | Nickel foam        | 31.1@10                                        | not provided                           | 1         |
| Co <sub>4</sub> N-CeO <sub>2</sub> /GP           | Graphitic<br>Plate | 24@10                                          | 4.0                                    | 2         |
| (Ru-Co)O <sub>x</sub>                            | Carbon cloth       | 44.1@10                                        | not provided                           | 3         |
| Fe <sub>x</sub> Ni <sub>3-x</sub> S <sub>2</sub> | Nickel foam        | 72@10                                          | not provided                           | 4         |
| Ni <sup>III</sup> Co <sup>II</sup> Fe-O          | Nickel foam        | 58@10                                          | not provided                           | 5         |
| NF-Na-Fe-Pt                                      | Nickel foam        | 31@10                                          | not provided                           | 6         |
| CoFeZr oxides                                    | Nickel foam        | 104@10                                         | not provided                           | 7         |

|                                                                  |              |         |              |    |
|------------------------------------------------------------------|--------------|---------|--------------|----|
| Co-Co <sub>2</sub> C                                             | Carbon cloth | 96@10   | 3.2          | 8  |
| Ni-Mo <sub>2</sub> C/NC                                          | Nickel foam  | 40@10   | 2.5          | 9  |
| Fe-CoP                                                           | Nickel foam  | 78@10   | 4.2          | 10 |
| Ru-NiCoP                                                         | Nickel foam  | 44@10   | not provided | 11 |
| Ru-MnFeP                                                         | Nickel foam  | 35@10   | not provided | 12 |
| MoNi <sub>3</sub> S <sub>2</sub> /Ni <sub>x</sub> P <sub>y</sub> | Nickel foam  | 109@10  | 3.15         | 13 |
| CoFe PBA@CoP                                                     | Nickel foam  | 100@10  | not provided | 14 |
| V-doped CoP                                                      | Nickel foam  | 84.6@10 | not provided | 15 |
| CoMnP/Ni <sub>2</sub> P                                          | Nickel foam  | 108@10  | 1.62         | 16 |
| Ni <sub>2</sub> P-Fe <sub>2</sub> P                              | Nickel foam  | 128@10  | 15           | 17 |
| Co <sub>2</sub> P-Ni <sub>2</sub> P                              | Nickel foam  | 90@10   | 1.51         | 18 |

**Table S6.** Performance comparison of RuV-CoNiP/NF and recently reported self-supporting water splitting catalysts in 1M KOH.

| Catalyst                           | Support         | Cell voltage@j<br>(V@mA cm <sup>-2</sup> ) | Mass loading<br>(mg cm <sup>-2</sup> ) | reference |
|------------------------------------|-----------------|--------------------------------------------|----------------------------------------|-----------|
| RuV-CoNiP                          | Nickel foam     | 1.469 V@10                                 | 3.6                                    | This work |
| IrNi-FeNi <sub>3</sub>             | Nickel foam     | 1.47@10                                    | not provided                           | 1         |
| Co <sub>4</sub> N-CeO <sub>2</sub> | Graphitic Plate | 1.507@10                                   | 4.0                                    | 2         |



---

|                                                                   |              |          |              |    |
|-------------------------------------------------------------------|--------------|----------|--------------|----|
| (Ru–Co)O <sub>x</sub>                                             | Carbon cloth | 1.488@10 | not provided | 3  |
| Fe <sub>x</sub> Ni <sub>3-x</sub> S <sub>2</sub>                  | Nickel foam  | 1.51@10  | not provided | 4  |
| Ni <sup>III</sup> Co <sup>II</sup> Fe–O                           | Nickel foam  | 1.455@10 | not provided | 5  |
| NF–Na–Fe–Pt                                                       | Nickel foam  | 1.56@10  | not provided | 6  |
| CoFeZr oxides                                                     | Nickel foam  | 1.63@20  | not provided | 7  |
| Co–Co <sub>2</sub> C                                              | Carbon cloth | 1.63@10  | 3.2          | 8  |
| Ni–Mo <sub>2</sub> C/NC                                           | Nickel foam  | 1.59@10  | 2.5          | 9  |
| Fe–CoP                                                            | Nickel foam  | 1.49@10  | 4.2          | 10 |
| Ru–NiCoP                                                          | Nickel foam  | 1.515@10 | not provided | 11 |
| Ru–MnFeP                                                          | Nickel foam  | 1.47@10  | not provided | 12 |
| Mo–Ni <sub>3</sub> S <sub>2</sub> /Ni <sub>x</sub> P <sub>y</sub> | Nickel foam  | 1.46@10  | 3.15         | 13 |
| CoFe PBA@CoP                                                      | Nickel foam  | 1.542@10 | not provided | 14 |
| V-doped CoP                                                       | Nickel foam  | 1.53@10  | not provided | 15 |
| CoMnP/Ni <sub>2</sub> P                                           | Nickel foam  | 1.54@10  | 1.62         | 16 |
| Ni <sub>2</sub> P–Fe <sub>2</sub> P                               | Nickel foam  | 1.561@10 | 15           | 17 |
| Co <sub>2</sub> P–Ni <sub>2</sub> P                               | Nickel foam  | 1.47@10  | 1.51         | 18 |

---

## Notes and References

1. Y. Wang, G. Qian, Q. Xu, H. Zhang, F. Shen, L. Luo and S. Yin, *Appl. Catal. B*, 2021, **286**, 119881.
2. H. Sun, C. Tian, G. Fan, J. Qi, Z. Liu, Z. Yan, F. Cheng, J. Chen, C. P. Li and M. Du, *Adv. Funct. Mater.*, 2020, **30**, 1910596.
3. C. Wang and L. Qi, *Angew. Chem. Int. Ed. Engl.*, 2020, **59**, 17219-17224.
4. B. Fei, Z. Chen, J. Liu, H. Xu, X. Yan, H. Qing, M. Chen and R. Wu, *Adv. Energy Mater.*, 2020, **10**, 2001963.
5. Z. Wang, P. Guo, S. Cao, H. Chen, S. Zhou, H. Liu, H. Wang, J. Zhang, S. Liu, S. Wei, D. Sun and X. Lu, *Appl. Catal. B*, 2021, **284**, 119725.
6. Y. Zhao, Y. Gao, Z. Chen, Z. Li, T. Ma, Z. Wu and L. Wang, *Appl. Catal. B*, 2021, **297**, 120395.
7. L. Huang, D. Chen, G. Luo, Y. R. Lu, C. Chen, Y. Zou, C. L. Dong, Y. Li and S. Wang, *Adv. Mater.*, 2019, **31**, 1901439.
8. P. Wang, J. Zhu, Z. Pu, R. Qin, C. Zhang, D. Chen, Q. Liu, D. Wu, W. Li, S. Liu, J. Xiao and S. Mu, *Appl. Catal. B*, 2021, **296**, 120334.
9. Z. Xu, S. Jin, M. H. Seo and X. Wang, *Appl. Catal. B*, 2021, **292**, 120168.
10. L. M. Cao, Y. W. Hu, S. F. Tang, A. Iljin, J. W. Wang, Z. M. Zhang and T. B. Lu, *Adv. Sci.*, 2018, **5**, 1800949.
11. D. Chen, R. Lu, Z. Pu, J. Zhu, H.-W. Li, F. Liu, S. Hu, X. Luo, J. Wu, Y. Zhao and S. Mu, *Appl. Catal. B*, 2020, **279**, 119396.
12. D. Chen, Z. Pu, R. Lu, P. Ji, P. Wang, J. Zhu, C. Lin, H. W. Li, X. Zhou, Z. Hu, F. Xia, J. Wu and S. Mu, *Adv. Energy Mater.*, 2020, **10**, 2000814.
13. X. Luo, P. Ji, P. Wang, R. Cheng, D. Chen, C. Lin, J. Zhang, J. He, Z. Shi, N. Li, S. Xiao and S. Mu, *Adv. Energy Mater.*, 2020, **10**.
14. L. Quan, S. Li, Z. Zhao, J. Liu, Y. Ran, J. Cui, W. Lin, X. Yu, L. Wang, Y. Zhang and J. Ye, *Small Methods*, 2021, **5**.
15. H. Xue, A. Meng, H. Zhang, Y. Lin, Z. Li and C. Wang, *Nano Res.*, 2021, **14**, 4173-4181.
16. M. Liu, Z. Sun, S. Li, X. Nie, Y. Liu, E. Wang and Z. Zhao, *J. Mater. Chem. A*, 2021, **9**, 22129-22139.
17. L. Wu, L. Yu, F. Zhang, B. McElhenny, D. Luo, A. Karim, S. Chen and Z. Ren, *Adv. Funct. Mater.*, 2020, **31**, 2006484.
18. B. Deng, L. Zhou, Z. Jiang and Z.-J. Jiang, *J. Catal.*, 2019, **373**, 81-92.
